# Supplementary material
Source: MDPI journal article supplement (https://www.mdpi.com/2624-845X/4/1/3)
Supplement: s1 [file s1]

# Fluorescent Gold Nanoparticles in Suspension as an Efficient Theranostic Agent for Highly Radio-Resistant Cancer Cells

Sarah Vogel <sup>1,2,3</sup>, Alice O'Keefe <sup>1,2,3</sup>, Léa Seban <sup>4</sup>, Michael Valceski <sup>1,2,3</sup>, Elette Engels <sup>1,2</sup>, Abass Khochaiche <sup>1,2,3</sup>, Carolyn Hollis <sup>1,2,3</sup>, Michael Lerch <sup>1,2</sup>, Stéphanie Corde <sup>1,2,5</sup>, Christophe Massard <sup>4</sup>, Komla Oscar Awitor <sup>4,\*</sup> and Moeava Tehei <sup>1,2,3,\*</sup>

- <sup>1</sup> Centre for Medical Radiation Physics, Faculty of Engineering and Information Science, University of Wollongong, Wollongong, NSW 2522, Australia; sv855@uowmail.edu.au (S.V.); aok914@uowmail.edu.au (A.O.); mv178@uowmail.edu.au (M.V.); elette@uow.edu.au (E.E.); ak049@uowmail.edu.au (A.K.); cmh253@uowmail.edu.au (C.H.); mlerch@uow.edu.au (M.L.); stephanie.cordetehei@health.nsw.gov.au (S.C.)
- <sup>2</sup> Illawarra Health and Medical Research Institute (IHMRI), University of Wollongong, Wollongong, NSW 2522, Australia
- <sup>3</sup> Molecular Horizons, University of Wollongong, Wollongong, NSW 2522, Australia
- <sup>4</sup> CNRS/IN2P3, Laboratoire de Physique de Clermont (LPC+), UMR 6533, Université Clermont Auvergne, 5 Avenue Blaise Pascal CS 30086, 63178 Aubiere, France; lea.seban@etu.uca.fr (L.S.); christophe.massard@uca.fr (C.M.)
- <sup>5</sup> Radiation Oncology Department, Prince of Wales Hospital, Randwick, NSW 2031, Australia
- \* Correspondence: komla.awitor@uca.fr (K.O.A.); moeava@uow.edu.au (M.T.)

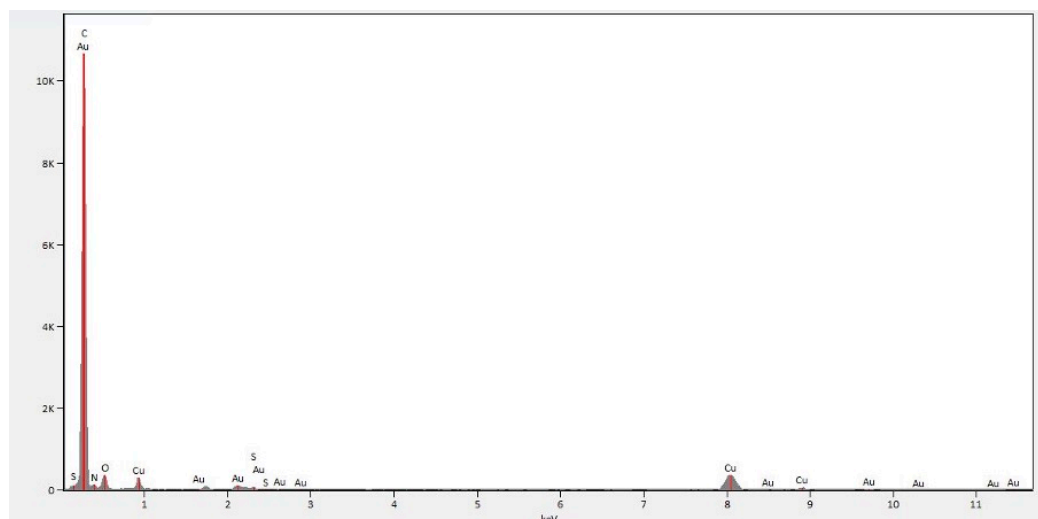

**Figure S1.** Elemental mapping of AuNP suspension.
